# Supplementary material
Source: publisher site journal article supplement (https://www.dovepress.com/article/292943)
Supplement: Supplementary file 1 [file get_supplementary_file.php]

**Supplementary table S1:** Relation between oral steroid use (A)/antibiotic use (B)/overnight hospital stays (C)/emergency department visits (D) and SABA use adjusted for confounders (n=736)

| **Predictors** | **Coefficients (SE)** | **p-value** | **OR** | **95% CI for OR** | |
| --- | --- | --- | --- | --- | --- |
|  |  |  |  | **Lower** | **Upper** |
| **A:** *Relation between* ***oral steroid use*** *and SABA use adjusted for confounders* | | | | | |
| SABA use  (0= low SABA users; 1= high SABA user) | 1.056 (0.189) | P<0.001 | 2.874 | 1.984 | 4.162 |
| Age | 0.003 (0.009) | 0.109 | 1.003 | 0.985 | 1.022 |
| Gender (0= male; 1= female) | -0.759 (0.198) | P<0.001 | 0.468 | 0.318 | 0.689 |
| Using ICS containing treatment  (0= not using ICS; 1= using ICS) | 0.303 (0.202) | 0.135 | 1.354 | 0.910 | 2.012 |
| Years since asthma diagnosis  (0= <1 years ago; 1= ≥1 years ago) | 0.592 (0.376) | 0.116 | 1.898 | 0.864 | 3.780 |
| Comorbidity Index | 0.268 (0.116) | 0.021 | 1.307 | 1.042 | 1.640 |
|  |  |  |  |  |  |
| **B:** *Relation between* ***antibiotic use*** *and SABA use adjusted for confounders* | | | | | |
| SABA use  (0= low SABA users; 1= high SABA user) | 0.562 (0.157) | P<0.001 | 1.754 | 1.289 | 2.387 |
| Age | -0.003 (0.008) | 0.706 | 0.997 | 0.981 | 1.013 |
| Gender (0= male; 1= female) | -0.204 (0.175) | 0.244 | 0.815 | 0.578 | 1.150 |
| Using ICS containing treatment  (0= not using ICS; 1= using ICS) | 0.087 (0.172) | 0.613 | 1.091 | 0.779 | 1.529 |
| Smoking status (0= no smoker; 1= smoker) | 0.251 (0.177) | 0.156 | 1.286 | 0.909 | 1.818 |
| Comorbidity Index | 0.430 (0.116) | P<0.001 | 1.537 | 1.226 | 1.928 |
|  |  |  |  |  |  |
| **C:** *Relation between* ***overnight hospital stays*** *and SABA use adjusted for confounders* | | | | | |
| SABA use  (0= low SABA users; 1= high SABA user) | 1.850 (0.539) | 0.001 | 6.360 | 2.211 | 18.294 |
| Gender (0= male; 1= female) | -1.356 (0.349) | P<0.001 | 0.258 | 0.130 | 0.511 |
| Using ICS containing treatment  (0= not using ICS; 1= using ICS) | -0.562 (0.355) | 0.113 | 0.570 | 0.284 | 1.142 |
| Comorbidity Index | 0.490 (0.184) | 0.008 | 1.633 | 1.139 | 2.342 |
|  | | | | | |
| **D:** *Relation between* ***emergency department visits*** *and SABA use adjusted for confounders* | | | | | |
| SABA use  (0= low SABA users; 1= high SABA user) | 1.530 (0.356) | P<0.001 | 4.616 | 2.296 | 9.282 |
| Gender (0= male; 1= female) | -1.283 (0.268) | P<0.001 | 0.277 | 0.164 | 0.469 |
| Using ICS containing treatment  (0= not using ICS; 1= using ICS) | -0.073 (0.286) | 0.800 | 0.930 | 0.531 | 1.630 |
| Comorbidity Index | 0.617 (0.143) | P<0.000 | 1.854 | 1.401 | 2.453 |

**Abbreviations:** SABA, Short-acting Beta-agonist; SE, standard error; OR, Odds ratio; CI, Confidence interval; ICS, Inhaled corticosteroids

**Notes:** The confounders comorbidity index, smoking status and number of years since asthma diagnosis were added to the models based on their relation (p<0.20) with the dependent or independent variable. The variable age was not added to model B since the linearity assumption was not met.

**Supplementary Table S2:** Demographics and characteristics as reported by respondents, of the total group of asthma patients including those with co-diagnosis of COPD (n=817), according to SABA use

|  | **Respondents with <3 SABA (low-SABA users) in the last week**  **38.2% (n=312)** | **Respondents with ≥3 SABA (high-SABA users) in the last week**  **61.8% (n=505)** | **P valuesa** |
| --- | --- | --- | --- |
| Gender, % (n) |  |  |  |
| Female | 75.0% (n=234) | 70.7% (n=357) | P=0.181 |
| Male | 25.0% (n=78) | 29.3% (n=148) |
|  |  |  |  |
| Age, years, median [range] | 35 [26-43] | 39 [29-45] | **P<0.001** |
|  |  |  |  |
| Age range, years, % (n) |  |  |  |
| 18 ­– 25 | 24.0% (n=75) | 15.6% (n=79) | **P=0.003** |
| 26 – 40 | 42.3% (n=132) | 39.6% (n=200) |
| 41 – 50 | 33.7% (n=105) | 44.8% (n=226) |
|  |  |  |  |
| Year since asthma diagnosis, % (n) |  |  |  |
| Data available | 83.0% (n=259) | 87.5% (n=442) |  |
| 1 or less | 5.4% (n=14) | 7.7% (n=34) | P=0.158 |
| 2 – 5 | 13.1% (n=34) | 10.0% (n=44) |
| 6 – 10 | 16.2% (n=42) | 12.2% (n=54) |
| 11 or more | 65.3 (n=169) | 70.1% (n=310) |
|  |  |  |  |
| Current smokers, % (n) | 26.0% (n=81) | 27.3% (n=138) | P=0.365 |
|  |  |  |  |
| Co-morbidities*, % (n) |  |  |  |
| COPD | 5.8% (n=18) | 12.5% (n=63) | **P=0.002** |
| Diabetes | 4.8% (n=15) | 8.9% (n=45) | **P=0.029** |
| Depression | 15.7% (n=49) | 17.4% (n=88) | P=0.522 |
| Heart disease | 2.2% (n=7) | 4.2% (n=21) | P=0.144 |
| High blood pressure | 8.3% (n=26) | 14.7% (n=74) | **P=0.007** |
| Rheumatoid arthritis | 5.1% (n=16) | 10.7% (n=54) | **P=0.006** |
| Cancer | 0.6% (n=2) | 2.8% (n=14) | **P=0.033** |
| Comorbidity Index |  |  |  |
| 0 | 0.0% (n=0) | 0.0% (n=0) | P=0.338 |
| 1 | 33.3% (n=6) | 38.1% (n=24) |
| 2 | 33.3% (n=6) | 38.1% (n=24) |
| 3 | 16.7% (n=3) | 9.5% (n=6) |
| 4 | 11.1% (n=2) | 1.6% (n=1) |
| 5 | 0.0% (n=0) | 0.0% (n=0) |
| 6 | 5.6% (n=1) | 4.8% (n=3) |
| 7 | 0.0% (n=0) | 0.0% (n=0) |
| 8 | 0.0% (n=0) | 7.9% (n=5) |
|  |  |  |  |
| Treatment type#, % (n) |  |  |  |
| Reliever (SABA) | 75.0% (n=234) | 74.3% (n=375) | P=0.942 |
| Preventer (ICS) | 41.3% (n=129) | 48.5% (n=245) | P=0.051 |
| Combination inhaler (ICS/LABA) | 26.0% (n=81) | 34.9% (n=176) | **P=0.008** |
| Oral treatment | 7.1% (n=22) | 20.4% (n=103) | **P<0.001** |
| Other asthma medication | 5.8% (n=18) | 16.0% (n=81) | **P<0.001** |

**Abbreviations:** SABA, short-acting beta2 agonist; COPD, chronic obstructive pulmonary disease; ICS, inhaled corticosteroids; LABA, long acting beta2 agonist; *, self-reported as having been diagnosed by a doctor; a, p values are two sided for the difference between <3 SABA and ≥3 SABA groups;
# Which of the following treatments do you currently take to help manage your asthma? - multiple answers possible


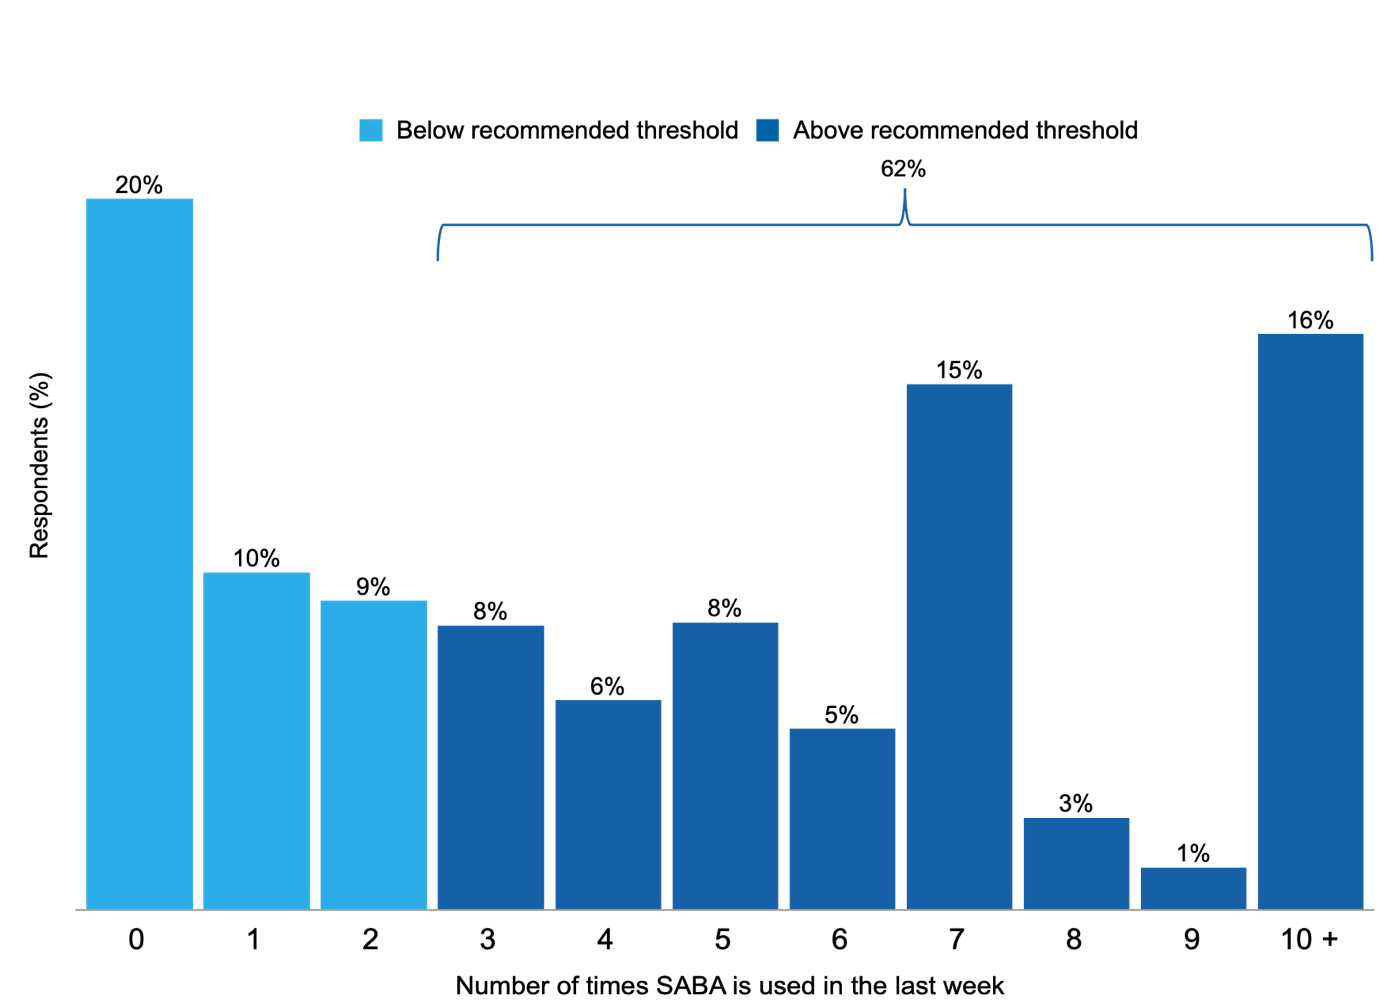


**Supplementary Figure S1:** SABA usage in the last week of the total group of asthma patients including those with co-diagnosis of COPD (n=817)

**Notes:** Survey question: “Thinking about the last week. How many times have you used your reliever inhaler? (This is usually a blue colour)”; The reported percentages are rounded to whole numbers

**
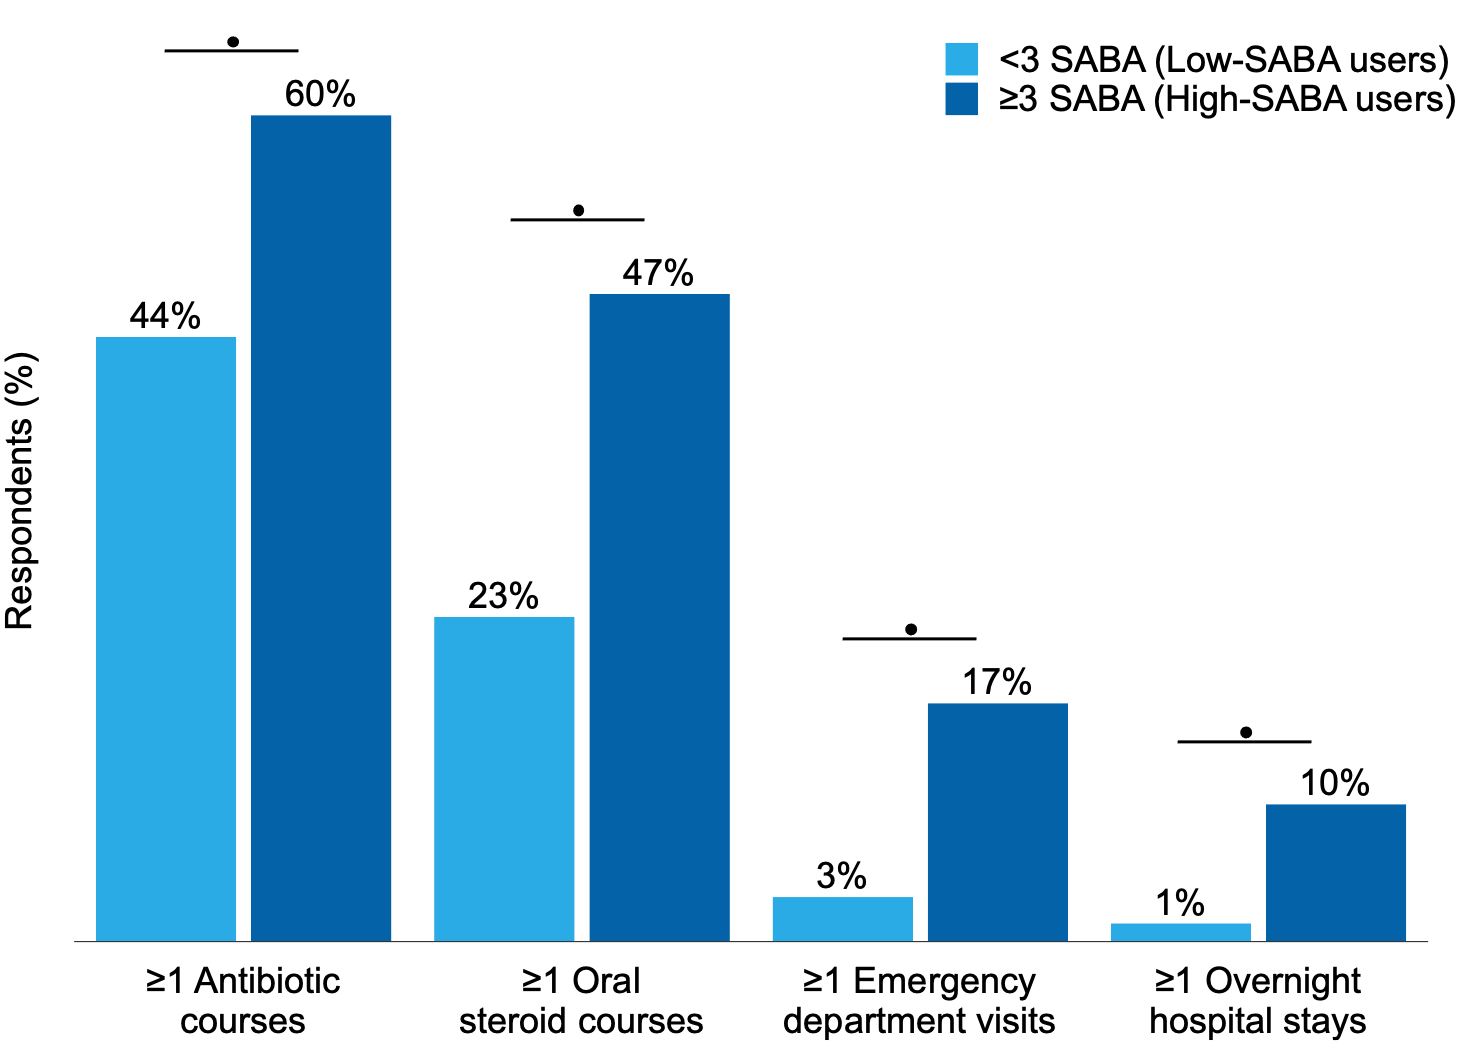
**

**Supplementary Figure S2:** Indicators of exacerbations, of the total group of asthma patients including those with co-diagnosis of COPD (n=817), according to SABA use (<3 times or ≥3 times/week)

**Abbreviations:** , significant difference p<0.001
**Notes:** <3 SABA (Low-SABA users) n=312; ≥ 3 SABA (High-SABA users) n=505; P values are two sided; The reported percentages are rounded to whole numbers


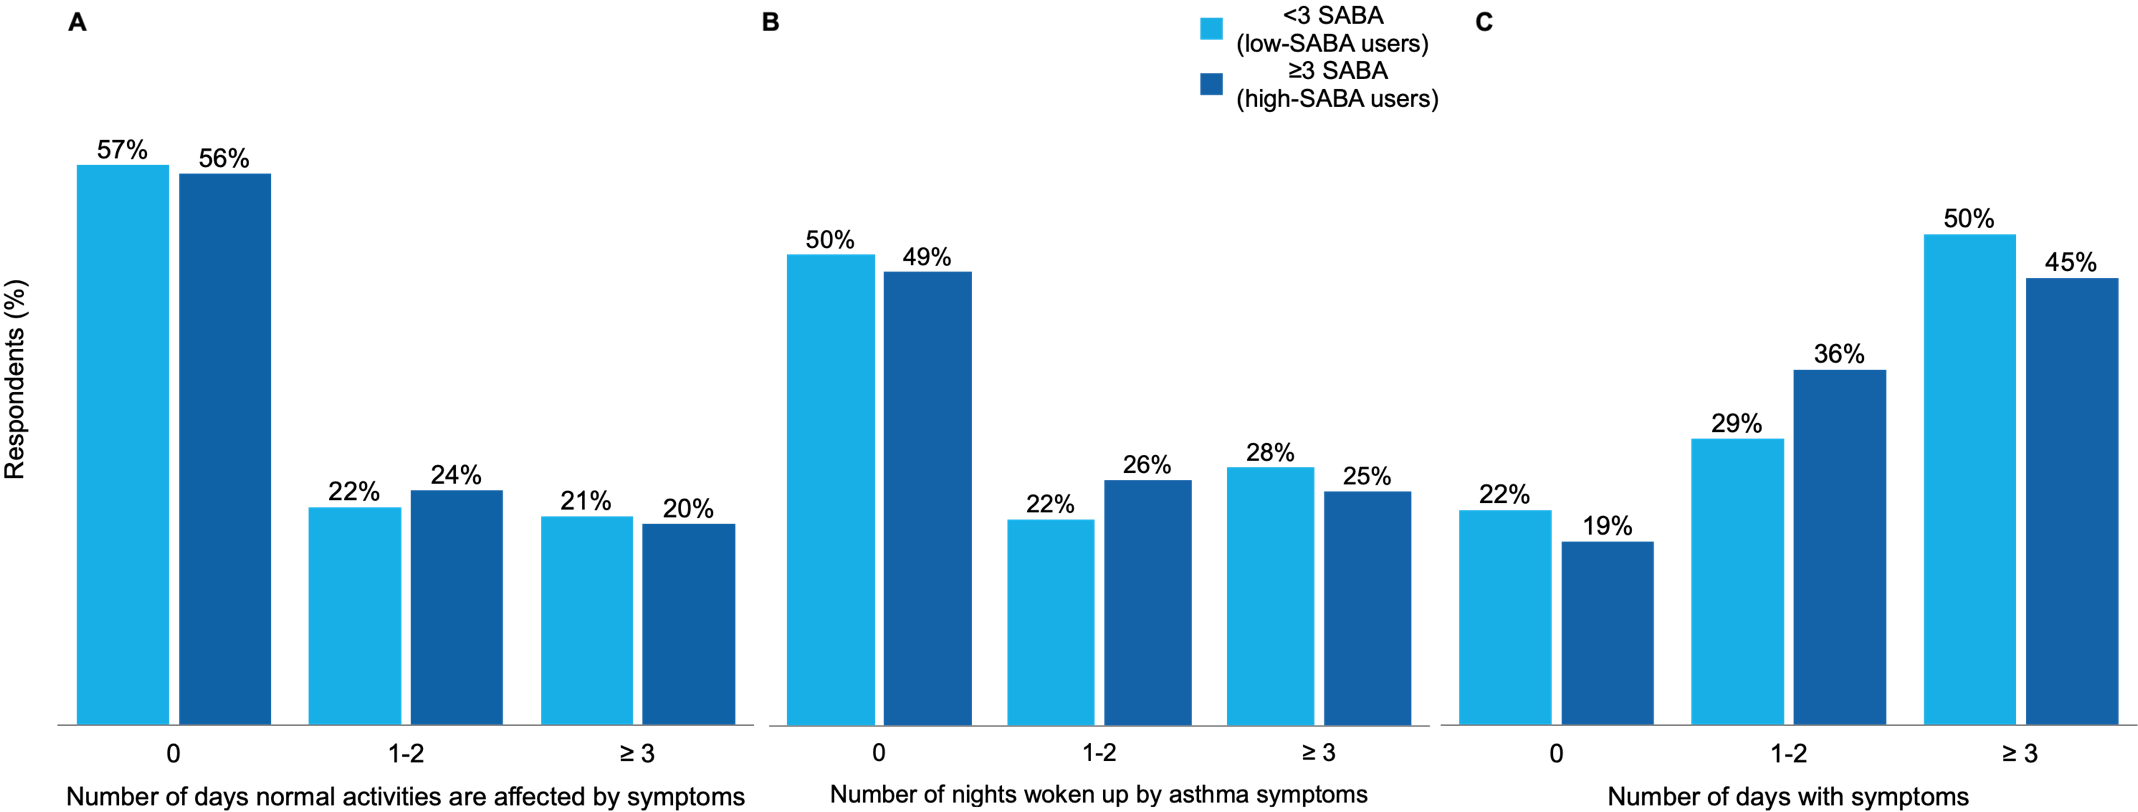


**Supplementary Figure S3:** Indicators of asthma symptoms, of the total group of asthma patients including those with co-diagnosis of COPD (n=817) according to SABA use (<3 or ≥3 times/week)

**Notes:** <3 SABA (Low-SABA users) n=312; ≥3 SABA(High-SABA users) n=505;
P values are two sided, A: p=0.858, B: p=0.377, C: p= 0.081; The reported percentages are rounded to whole numbers

**
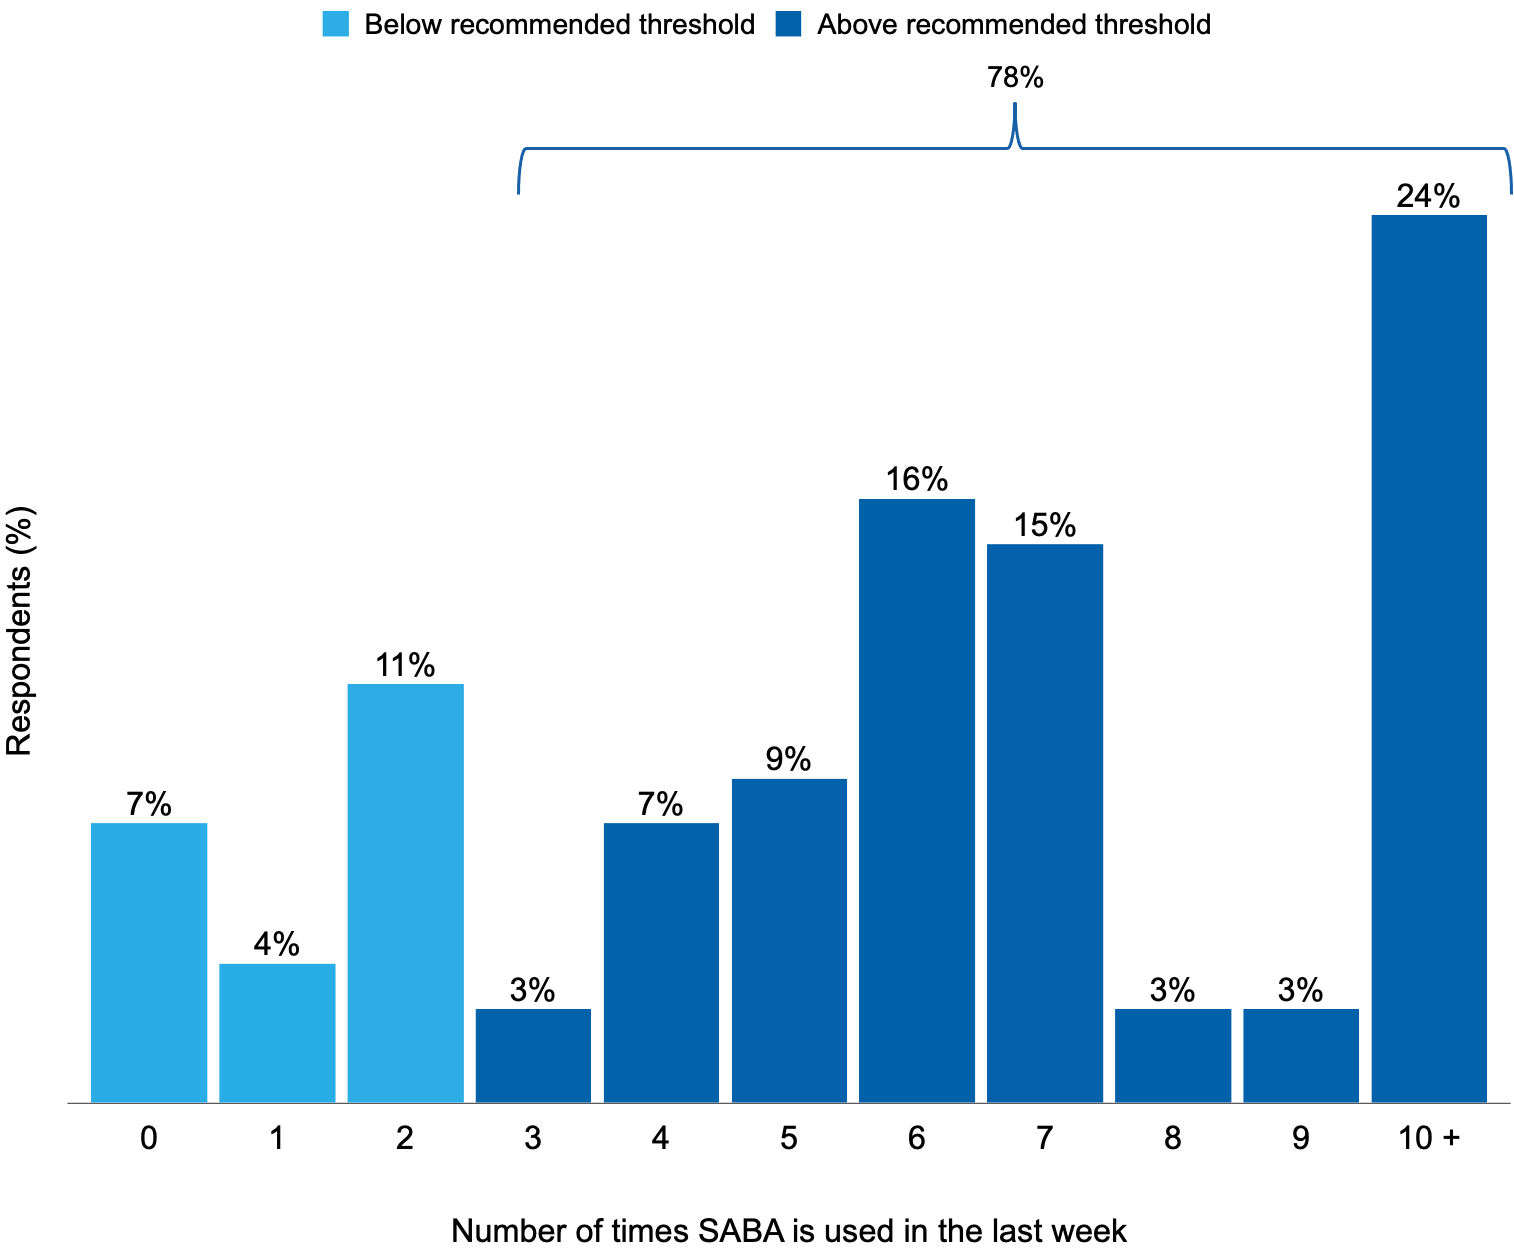
**

**Supplementary figure S4:** SABA usage in the last week (n=81)

**Notes:** Survey question: “Thinking about the last week. How many times have you used your reliever inhaler? (This is usually a blue colour)”; The reported percentages are rounded to whole numbers


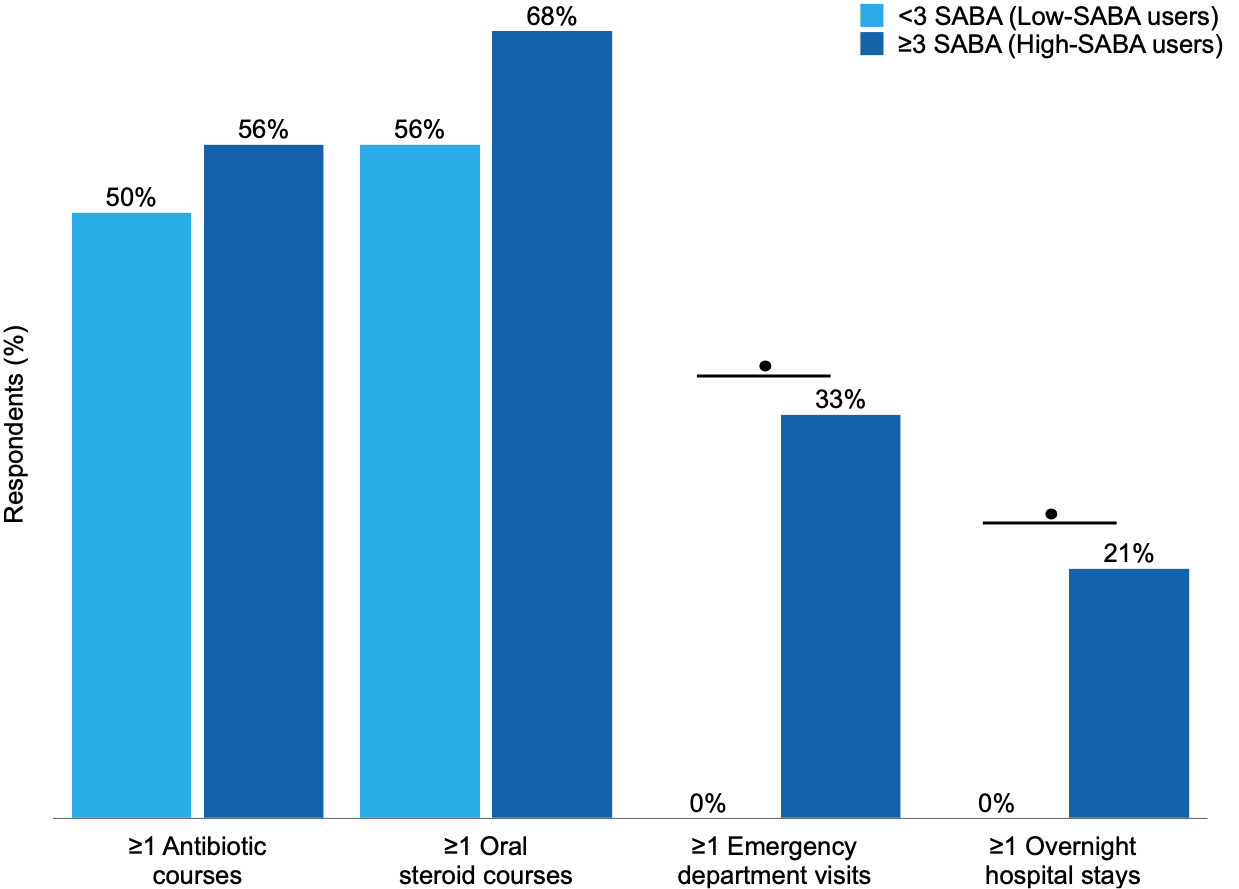


**Supplementary figure S5:** Indicators of exacerbations (n=81), according to SABA use (<3 times or ≥3 times/week)

**Abbreviations:** , significant difference p<0.001

**Notes:** <3 SABA (Low-SABA users) n=18; ≥ 3 SABA (High-SABA users) n=63;
P values are two sided; The reported percentages are rounded to whole numbers


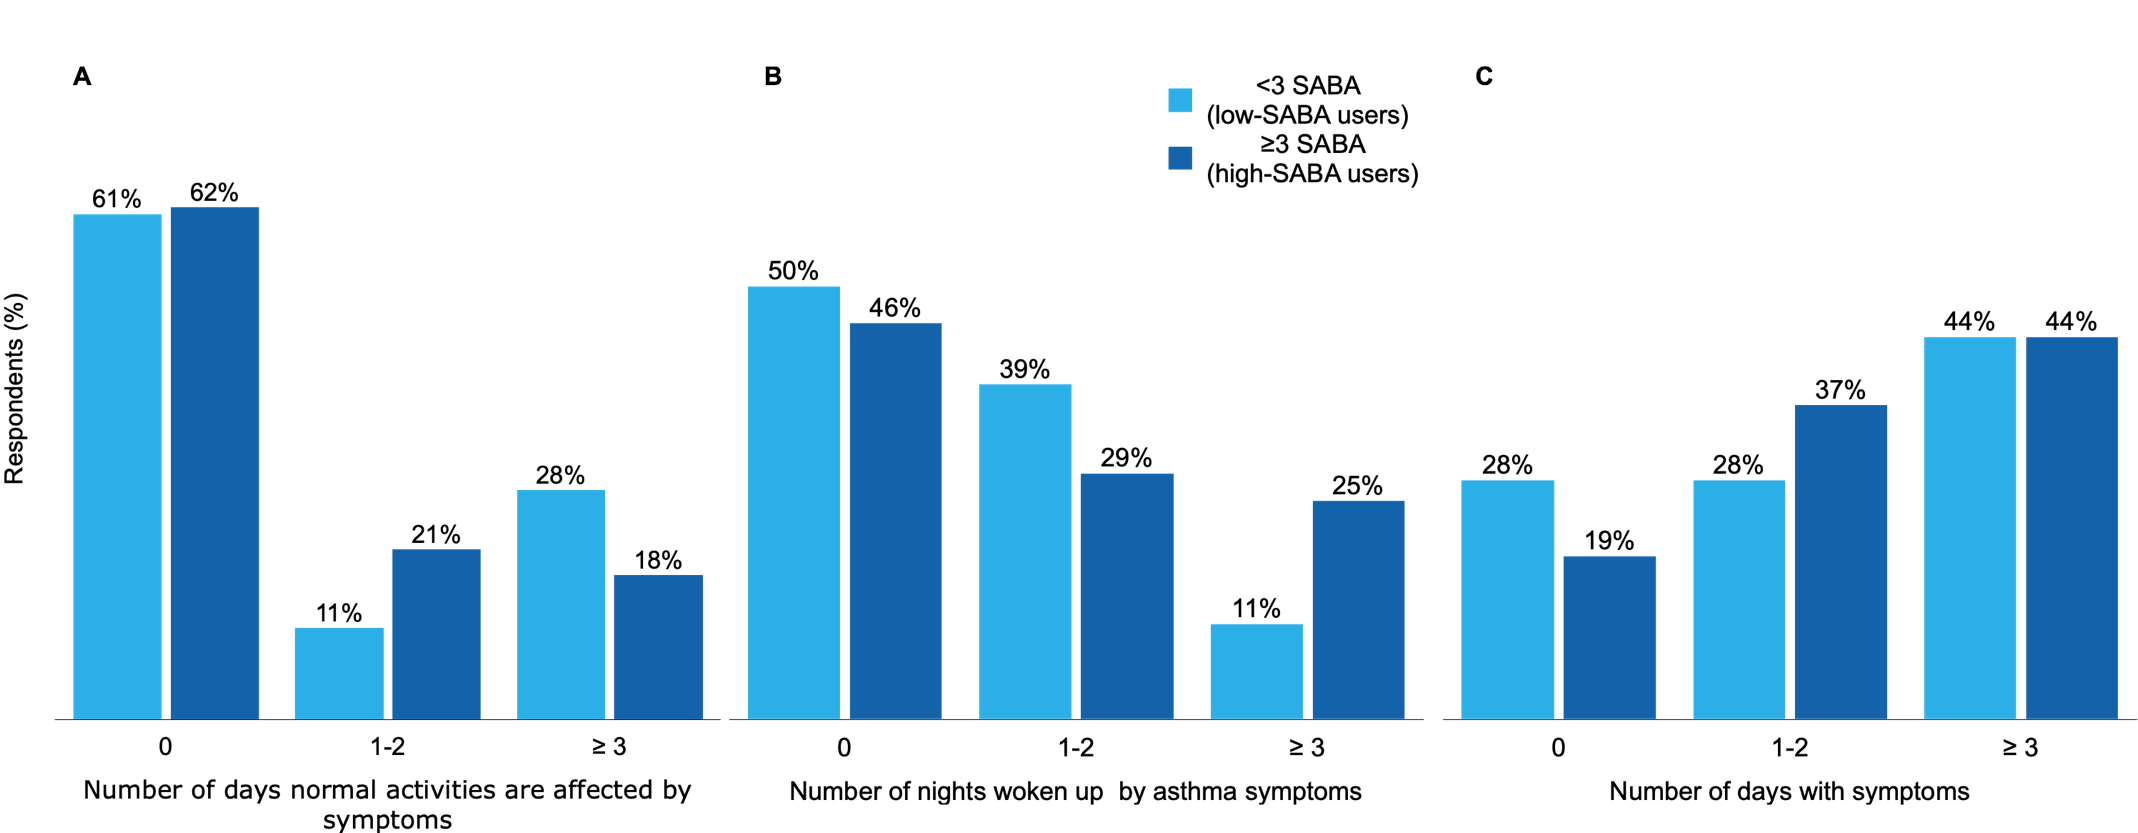


**Supplementary figure S6:** Indicators of asthma symptoms (n=81), according to SABA use (<3 or ≥3 times/week)

**Notes:** <3 SABA (Low-SABA users) n=18; ≥3 SABA(High-SABA users) n=63;
P values are two sided, A: p=0.486, B: p=0.403, C: p= 0.665; The reported percentages are rounded to whole numbers
